# Supplementary material
Source: ML conference proceedings conference paper supplement (https://proceedings.mlr.press/v37/tansey15.html)
Supplement: Supplementary file [file tansey15-supp.pdf]

# Vector-Space Markov Random Fields via Exponential Families

## Appendix

### A. Proof of Theorem 1

The proof follows the same lines as the proof in Yang et al. (2014). Let us denote  $Q(X)$  as  $\log(P(X)/P(0))$ . Note that  $X = (X_1, X_2, \dots, X_p)$  and each  $X_r$  belongs to a vector space. Given any  $X$ , let us denote  $\bar{X}_s$  as  $\bar{X}_s = (X_1, \dots, X_{s-1}, 0, X_{s+1}, \dots, X_p)$ . Consider the following expansion for  $Q(X)$ :

$$\begin{aligned}
 Q(X) &= \sum_{t \in \{1, \dots, p\}} \mathcal{I}[X_t \neq 0] G_t(X_t) + \dots \\
 &+ \sum_{\substack{t_1, \dots, t_k \in \\ \{1, \dots, p\}}} \mathcal{I}[X_{t_1} \neq 0, \dots, X_{t_k} \neq 0] G_{t_1 \dots t_k}(X_{t_1} \dots X_{t_k})
 \end{aligned} \tag{A.1}$$

where  $\mathcal{I}$  is the indicator function which takes value 1 if its argument evaluates to true and 0 otherwise.

Using some simple algebra and the definition  $Q(X) = \log(P(X)/P(0))$  we can show that

$$\exp(Q(X) - Q(\bar{X}_s)) = \frac{P(X_s | X_1, \dots, X_{s-1}, X_{s+1}, \dots, X_p)}{P(0 | X_1, \dots, X_{s-1}, X_{s+1}, \dots, X_p)} \tag{A.2}$$

From (A.1) we have the following:

$$\begin{aligned}
 (Q(X) - Q(\bar{X}_s)) &= \mathcal{I}[X_s \neq 0] \left( G_s(X_s) + \sum_{t \in \{1, \dots, p\} \setminus s} \mathcal{I}[X_t \neq 0] G_{s,t}(X_s, X_t) \right. \\
 &\left. + \sum_{\substack{t_2, \dots, t_k \in \\ \{1, \dots, p\} \setminus s}} \mathcal{I}[X_{t_2} \neq 0, \dots, X_{t_k} \neq 0] G_{s, t_2 \dots t_k}(X_s, \dots, X_{t_k}) \right)
 \end{aligned} \tag{A.3}$$

Since the node conditional distribution follows the exponential family distribution defined in (6) we can show that:

$$\log \frac{P(X_s | X_1, \dots, X_{s-1}, X_{s+1}, \dots, X_p)}{P(0 | X_1, \dots, X_{s-1}, X_{s+1}, \dots, X_p)} = \langle E_s(X_s), B_s(X_s) - B_s(0) \rangle + (C_s(X_s) - C_s(0)) \tag{A.4}$$

Using (A.3) and (A.4) for left and right hand sides of (A.2) and setting  $X_t = 0$  for all  $t \neq s$  we obtain:

$$\mathcal{I}[X_s \neq 0] G_s(X_s) = \langle E_s(0), B_s(X_s) - B_s(0) \rangle + (C_s(X_s) - C_s(0))$$

Similarly setting  $X_r = 0$  for all  $r \notin \{s, t\}$  we obtain:

$$\mathcal{I}[X_s \neq 0] G_s(X_s) + \mathcal{I}[X_s \neq 0, X_t \neq 0] G_{s,t}(X_s, X_t) = \langle E_s(0 \dots X_t \dots, 0), B_s(X_s) - B_s(0) \rangle + (C_s(X_s) - C_s(0))$$

Similarly, replacing  $X_s$  with  $X_t$  in (A.2) and setting  $X_r = 0$  for all  $r \notin \{s, t\}$  we obtain:

$$\mathcal{I}[X_t \neq 0] G_t(X_t) + \mathcal{I}[X_s \neq 0, X_t \neq 0] G_{s,t}(X_s, X_t) = \langle E_t(0 \dots X_s \dots, 0), B_t(X_t) - B_t(0) \rangle + (C_t(X_t) - C_t(0))$$

From the above three equations we arrive at the following equality:

$$\begin{aligned}
 \langle E_s(0 \dots X_t \dots, 0) - E_s(0), B_s(X_s) - B_s(0) \rangle &= \\
 \langle E_t(0 \dots X_s \dots, 0) - E_t(0), B_t(X_t) - B_t(0) \rangle &
 \end{aligned} \tag{A.5}$$

The above equality should hold for the node conditional distributions to be consistent with the joint MRF distribution over  $X$  with respect to graph  $G$ . So we need to find the form of  $E_r(\cdot)$  that satisfies the above equation. Omitting zero vectors for clarity from (A.5), we get the following:

$$\begin{aligned}
 \langle E_t(X_s), B_t(X_t) \rangle &= \langle E_s(X_t), B_s(X_s) \rangle \\
 \sum_j E_{tj}(X_s) B_{tj}(X_t) &= \sum_l E_{sl}(X_t) B_{sl}(X_s)
 \end{aligned} \tag{A.6}$$

We rewrite the natural parameter functions as

$$\begin{aligned}
 E_{tj}(X_s) &= \sum_l \theta_{sl;tj} B_{sl}(X_s) + \bar{B}_{tj}(X_s) \\
 E_{sl}(X_t) &= \sum_j \bar{\theta}_{sl;tj} B_{tj}(X_t) + \bar{B}_{sl}(X_t)
 \end{aligned} \tag{A.7}$$

where  $\forall j \bar{B}_{tj}(X_s)$  are functions in the Hilbert space  $\mathcal{H}_s$  orthogonal to the span of functions  $B_s(X_s)$ , and  $\forall j \bar{B}_{sl}(X_t)$  are functions in the Hilbert space  $\mathcal{H}_t$  orthogonal to the span of functions  $B_t(X_t)$ ; and  $\theta_{sl;tj}, \bar{\theta}_{sl;tj}$  are scalars. Combining (A.6) and (A.7), we get

$$\begin{aligned}
 \sum_j \sum_l \theta_{sl;tj} B_{sl}(X_s) B_{tj}(X_t) + \sum_j \bar{B}_{tj}(X_s) B_{tj}(X_t) &= \\
 \sum_l \sum_j \bar{\theta}_{sl;tj} B_{sl}(X_s) B_{tj}(X_t) + \sum_l \bar{B}_{sl}(X_t) B_{sl}(X_s) &
 \end{aligned} \tag{A.8}$$

Rearranging terms in the above equation gives us the following equation:

$$\begin{aligned} & \sum_j \left( \sum_l (\theta_{sl;tj} - \bar{\theta}_{sl;tj}) B_{sl}(X_s) + \bar{B}_{tj}(X_s) \right) B_{tj}(X_t) \\ &= \sum_l B_{sl}(X_s) \bar{B}_{sl}(X_t) \end{aligned} \quad (\text{A.9})$$

However, since  $\forall l \bar{B}_{sl}(X_t)$  is orthogonal to  $B_t(X_t)$ , the left and right hand sides of the above equation are equal to 0, which leads us to the following equations.

$$\sum_l B_{sl}(X_s) \bar{B}_{sl}(X_t) = 0$$

$$\sum_j \left( \sum_l (\theta_{sl;tj} - \bar{\theta}_{sl;tj}) B_{sl}(X_s) + \bar{B}_{tj}(X_s) \right) B_{tj}(X_t) = 0 \quad (\text{A.10})$$

However since we assumed that the sufficient statistics are minimal we get  $\forall l \bar{B}_{sl}(X_t) = 0$  from the first equality and  $\forall j, l \theta_{sl;tj} = \bar{\theta}_{sl;tj}, \bar{B}_{tj}(X_s) = 0$  from the second equality.

Hence from (A.7), we obtain  $E_s(X_t) = \theta_{st}(B_t(X_t) - B_t(0))$  and  $E_t(X_s) = \theta_{st}^T(B_s(X_s) - B_s(0))$  where  $\theta_{st}$  is a matrix formed by the scalars  $\theta_{sl;tj}$  such that  $(\theta_{st})_{lj} = \theta_{sl;tj}$  and:

$$\mathcal{I}[X_s \neq 0, X_t \neq 0] G_{s,t}(X_s, X_t) = (B_t(X_t) - B_t(0))^T \theta_{st}^T (B_s(X_s) - B_s(0)) \quad (\text{A.11})$$

By extending this argument to higher order factors we can show that the natural parameters are required to be in the form specified by (7).

## B. Proof of Sparsistency

Before proving the sparsistency result, we will show that the sufficient statistics  $B_r(X_r)$  are well behaved. Recall that  $B_{ri}(X_r)$  indicates  $i^{\text{th}}$  component of the vector  $B_r(X_r)$ . We set the convention that whenever a variable has the subscript  $r$  attached we will be referring to the set of indexes  $\{(t, j, k) : \theta_{rj;tk} \in \theta_r, t \neq r\}$ .

**Proposition 1.** *Let  $\{X^{(j)}\}_{j=1}^n$  have joint distribution as in (10), then,*

$$P \left( \frac{1}{n} \sum_{j=1}^n \left( B_{ri}(X_r^{(j)}) \right)^2 \geq \delta \right) \leq \exp \left( -n \frac{\delta^2}{4k_h^2} \right) \quad (\text{B.12})$$

for  $\delta \leq \min \{2\frac{k_v}{3}, k_h + k_v\}$ .

*Proof.* It is clear from Taylor Series expansion and as-

sumption 4 that

$$\begin{aligned} & \log E \left[ \exp \left( t B_{ri}(X_r)^2 \right) \right] = \\ & \log \int_{\otimes_{s \in [p]} \mathcal{X}_s} \exp \left\{ t B_{ri}(X_r)^2 + \sum_{s \in V} \left\langle B_s(X_s), \theta_s^* + \sum_{t \in N(r)} \theta_{st}^* B_t(X_t) \right\rangle + \sum_{s \in V} C_s(X_s) - A(\theta^*) \right\} v(dx) \\ &= \bar{A}_{r,i}(\eta; \theta)(t; \theta^*) - \bar{A}_{r,i}(\eta; \theta)(0; \theta^*) \\ &\leq t \frac{\partial \bar{A}_{r,i}(\eta; \theta)}{\partial \eta}(0) + \frac{t^2}{2} \frac{\partial^2 \bar{A}_{r,i}(\eta; \theta)}{\partial \eta^2}(u t) \\ &\leq t k_v + \frac{t^2}{2} k_h \end{aligned} \quad (\text{B.13})$$

where  $u \in [0, 1]$

Therefore, by the standard Chernoff bounding technique, for  $t \leq 1$ , it follows that

$$\begin{aligned} & \mathbb{P} \left( \frac{1}{n} \sum_{j=1}^n B_{ri}(X_r^{(j)})^2 \geq \delta \right) \leq \\ & \exp \left( -n \delta t + n k_v t + \frac{t^2}{2} K_h n \right) \leq \\ & \exp \left( -n \frac{\delta^2}{4k_h^2} \right) \end{aligned} \quad (\text{B.14})$$

for  $\delta \leq \min \{2\frac{k_v}{3}, k_h + k_v\}$ .  $\square$

**Proposition 2.** *Let  $X$  be a random vector with the distribution specified in (10). Then, for any positive constant  $\delta$  and some constant  $c > 0$*

$$P \left( |B_{ri}(X_r)| \geq \delta \log(\eta) \right) \leq c \eta^{-\delta} \quad (\text{B.15})$$

*Proof.* Let  $\bar{v}$  be a unit vector with the same dimensions as  $\theta_r^*$  and exactly one non-zero entry, corresponding to the sufficient statistic  $B_{ri}(X_r)$ . Then we can write  $\log \left( E[\exp(B_{ri}(X_r))] \right)$  as:

$$\log \left( E[\exp(B_{ri}(X_r))] \right) = A(\theta^* + \bar{v}) - A(\theta^*)$$

By Taylor series expansion, for some  $u \in [0, 1]$ , we can rewrite last equation as

$$\begin{aligned} A(\theta^* + \bar{v}) - A(\theta^*) &= \nabla A(\theta^*) \cdot \bar{v} + \frac{1}{2} \bar{v}^T \nabla^2 A(\theta^* + u \bar{v}) \bar{v} \\ &= E[B_{ri}(X_r)] \|\bar{v}\|_2 \\ &\quad + \frac{1}{2} \frac{\partial^2 A(\theta^* + u \bar{v})}{\partial \theta_{ri}^2} \|\bar{v}\|_2^2 \end{aligned}$$

Using Assumption 4 we get the inequality :

$$A(\theta^* + \bar{v}) - A(\theta^*) \leq k_m + \frac{1}{2} k_h$$

Now, by using Chernoff bound, for any positive constant  $a$ , we get  $P(B_{ri}(X_r) \geq a) \leq \exp(-a + k_m + \frac{1}{2}k_h)$ . By setting  $a = \delta \log(\eta)$  it follows that

$$P(B_{ri}(X_r) \geq \delta \log(\eta)) \leq \exp(-\delta \log(\eta) + k_m + \frac{1}{2}k_h) \leq c\eta^{-\delta}$$

where  $c = \exp(k_m + \frac{1}{2}k_h)$   $\square$

The proof of Sparsistency is based on the primal dual witness proof technique. First note that the optimality condition of (14), can be written as:

$$\nabla \ell(\hat{\theta}_r; \mathcal{D}) + \lambda_1 \sum_{t:r \neq t} \sqrt{\nu_{rt}} \hat{Z}_{1,rt} + \lambda_2 \hat{Z}_2 = 0 \quad (\text{B.16})$$

where  $\hat{Z}_{1,rt} \in \partial \|\hat{\theta}_{rt}\|_2$ ,  $\hat{Z}_2 \in \partial \|\hat{\theta}_{\setminus r}\|_1$  and we denote  $\hat{Z} = (\hat{Z}_1, \hat{Z}_2)$ , where  $\hat{Z}_1 = \{\hat{Z}_{1,rt}\}_{t \in V \setminus r}$ . And sub-gradients  $\hat{Z}_1, \hat{Z}_2$  should satisfy the following conditions:

$$\begin{aligned} \forall i (\hat{Z}_2)_i &= \text{sign}((\hat{\theta}_r)_i) \text{ if } (\hat{\theta}_r)_i \neq 0 \\ &|(\hat{Z}_2)_i| \leq 1 \text{ otherwise} \\ \forall t \hat{Z}_{1,rt} &= \frac{\hat{\theta}_{rt}}{\|\hat{\theta}_{rt}\|_2} \text{ if } \hat{\theta}_{rt} \neq 0 \\ &\|\hat{Z}_{1,rt}\|_2 \leq 1 \text{ otherwise} \end{aligned} \quad (\text{B.17})$$

Note that we can think of  $\hat{Z}_1$  and  $\hat{Z}_2$  as dual variables by appealing to Lagrangian theory. The next lemma shows that graph structure recovery is guaranteed if the dual is strictly feasible.

**Lemma 1.** *Suppose that there exists a primal-dual pair  $(\hat{\theta}_r, \hat{Z})$  for (14) such that  $\|\hat{Z}_{1,S^c}\|_{\infty,2} < 1$  and  $\|\hat{Z}_{2,S^c}\|_{\infty} < 1$ . Then, any optimal solution  $\tilde{\theta}_r$  must satisfy  $(\tilde{\theta}_r)_{S^c} = 0$ . Moreover, if the Hessian sub-matrix  $[\nabla^2 \ell(\hat{\theta}_r)]_{SS}$  is positive definite then  $\hat{\theta}_{\setminus r}$  is the unique optimal solution.*

*Proof.* First, note that by Cauchy–Schwarz’s and Holder’s inequalities

$$\langle \hat{Z}_{1,rt}, \tilde{\theta}_{rt} \rangle \leq \|\tilde{\theta}_{rt}\|_2 \text{ and } \langle \hat{Z}_2, \tilde{\theta}_{\setminus r} \rangle \leq \|\tilde{\theta}_{\setminus r}\|_1. \quad (\text{B.18})$$

But from (B.16) and the primal optimality of  $\hat{\theta}_r$  and  $\tilde{\theta}_r$  for (14),

$$\begin{aligned} &\ell(\tilde{\theta}_r) + \sum_{t \neq r} \lambda_1 \sqrt{\nu_{rt}} \langle \hat{Z}_{1,rt}, \tilde{\theta}_{rt} \rangle + \lambda_2 \langle \hat{Z}_2, \tilde{\theta}_{\setminus r} \rangle \\ &\geq \min_{\theta} \ell(\theta_r) + \sum_{t \neq r} \lambda_1 \sqrt{\nu_{rt}} \langle \hat{Z}_{1,rt}, \theta_{rt} \rangle + \lambda_2 \langle \hat{Z}_2, \theta_{\setminus r} \rangle \\ &= \ell(\hat{\theta}_r) + \sum_{t \neq r} \lambda_1 \sqrt{\nu_{rt}} \langle \hat{Z}_{1,rt}, \hat{\theta}_{rt} \rangle + \lambda_2 \langle \hat{Z}_2, \hat{\theta}_{\setminus r} \rangle \\ &= \ell(\hat{\theta}_r) + \sum_{t \neq r} \lambda_1 \sqrt{\nu_{rt}} \|\hat{\theta}_{rt}\|_2 + \|\hat{\theta}_{\setminus r}\|_1 \end{aligned} \quad (\text{B.19})$$

hence, combining with (B.18) with (B.19) it follows that  $\sum_{t \neq r} \lambda_1 \sqrt{\nu_{rt}} \|\hat{\theta}_{rt}\|_2 + \|\hat{\theta}_{\setminus r}\|_1 = \sum_{t \neq r} \lambda_1 \sqrt{\nu_{rt}} \|\hat{\theta}_{rt}\|_2 + \|\hat{\theta}_{\setminus r}\|_1 = \sum_{t \neq r} \lambda_1 \sqrt{\nu_{rt}} \langle \hat{Z}_{1,rt}, \hat{\theta}_{rt} \rangle + \lambda_2 \langle \hat{Z}_2, \hat{\theta}_{\setminus r} \rangle$ . The result follows.

If the Hessian sub-matrix is positive definite for the restricted problem then the problem is strictly convex and has a unique solution.  $\square$

Based on the above lemma, we prove sparsistency theorem by constructing a primal-dual witness  $(\hat{\theta}_r, \hat{Z})$  with the following steps:

1. Set  $(\hat{\theta}_r)_{S^c} = \text{argmin}_{((\theta_r)_{S^c}, 0)} \ell((\theta_r)_S; \mathcal{D}) + \lambda_1 \sum_{t \in S} \sqrt{\nu_{rt}} \|\theta_{rt}\|_2 + \lambda_2 \|(\theta_r)_S\|_1$
2. For  $t \in S$ , we define  $\hat{Z}_{1,rt} = \frac{\theta_{rt}}{\|\theta_{rt}\|_2}$  and then construct  $\hat{Z}_{2,S}$  by the stationary condition.
3. Set  $(\hat{\theta}_r)_{S^c} = 0$
4. Set  $\hat{Z}_{2,S^c}$  such that  $\|\hat{Z}_{2,S^c}\|_{\infty} < 1$
5. Set  $\hat{Z}_{1,S^c}$  such that condition (B.16) is satisfied.
6. The final step consists of showing, that the following conditions are satisfied:

- (a) *strict dual feasibility*: the condition in Lemma 1 holds with high probability
- (b) *correct neighbourhood recovery*: the primal-dual pair specifies the neighbourhood of  $r$ , with high probability

We begin by proving some key lemmas that are key to our main theorem. The sub-gradient optimality condition (B.16) can be rewritten as:

$$\nabla \ell(\hat{\theta}_r; \mathcal{D}) - \nabla \ell(\theta_r^*; \mathcal{D}) = W^n - \lambda_1 \sum_{t:r \neq t} \sqrt{\nu_{rt}} \hat{Z}_{1,rt} - \lambda_2 \hat{Z}_2 \quad (\text{B.20})$$

where  $W^n = -\nabla \ell(\theta_r^*; \mathcal{D})$  and  $\theta_r^*$  is the true model parameter. By applying mean-value theorem coordinate wise to (B.20), we get:

$$\nabla^2 \ell(\theta_r^*; \mathcal{D}) [\hat{\theta}_r - \theta_r^*] = W^n - \lambda_1 \sum_{t:r \neq t} \sqrt{\nu_{rt}} \hat{Z}_{1,rt} - \lambda_2 \hat{Z}_2 + R^n \quad (\text{B.21})$$

where  $R^n$  is the remainder term after applying mean-value theorem:  $R_j^n = [\nabla^2 \ell(\theta_r^*; \mathcal{D}) - \nabla^2 \ell(\hat{\theta}_r^j; \mathcal{D})]_j^T (\hat{\theta}_r - \theta_r^*)$  for some  $\hat{\theta}_r^j$  on the line between  $\hat{\theta}_r$  and  $\theta_r^*$ , and with  $[\cdot]_j^T$  denoting the  $j$ -th row of matrix. The following lemma controls the score term  $W^n$

275  
276  
277  
278  
279  
280  
281  
282  
283  
284  
285  
286  
287  
288  
289  
290  
291  
292  
293  
294  
295  
296  
297  
298  
299  
300  
301  
302  
303  
304  
305  
306  
307  
308  
309  
310  
311  
312  
313  
314  
315  
316  
317  
318  
319  
320  
321  
322  
323  
324  
325  
326  
327  
328  
329

**Lemma 2.** Recall  $\nu_r \max = \max_t \nu_{rt}$ ,  $\nu_r \min = \min_t \nu_{rt}$ ,  $p' = \max(n, p)$ . Assume that

$$\frac{8(2-\alpha)}{\alpha} \sqrt{k_1(n, p) k_4 \frac{\nu_r \max \log(p \nu_r \max)}{n \nu_r \min}} \leq \lambda_1 + \lambda_2 \leq \frac{4(2-\alpha) \sqrt{\nu_r \max}}{\alpha \sqrt{\nu_r \min}} k_1(n, p) k_2(n, p) k_4 \quad (\text{B.22})$$

for some constant  $k_4 \leq \min\{2\frac{k_v}{3}, k_h + k_v\}$  and suppose also that  $n \geq \frac{8k_h^2}{k_4^2} \log(\sum_t m_t)$  then,

$$P\left(\|W_{V \setminus r}^n\|_{\infty, 2} > \frac{\alpha}{2-\alpha} \frac{\sqrt{\nu_r \min} (\lambda_1 + \lambda_2)}{4}\right) \leq 1 - c_1 p'^{-3} (\sum_t m_t) - \exp(-c_2 n) - \exp(-c_3 n) \quad (\text{B.23})$$

*Proof.* Define  $W_t^n = -\nabla_{\theta_{rt}} \ell(\theta_r^*; \mathcal{D})$ . Let  $W_{t,jk}^n$  be the element in  $W_t^n$  corresponding to parameter  $\theta_{rj;tk}$ . Note that  $W_{t,jk}^n = \frac{1}{n} \sum_{i=1}^n V_{t,jk}^i$  where

$$V_{t,jk}^i = B_{rj}(X_r^{(i)}) B_{tk}(X_t^{(i)}) - \nabla_{\theta_{rj;tk}} A_r(\theta_r^* + \sum_{s \in V \setminus r} \theta_{rs}^* B_s(X_s^{(i)})) B_{tk}(X_t^{(i)})$$

so for  $t' \in \mathbb{R}$

$$\begin{aligned} E\left[\exp(t' V_{t,jk}^i) | X_{V \setminus r}^{(i)}\right] &= \int_{X_r^{(i)}} \exp\left\{t' \left[B_{rj}(X_r^{(i)}) B_{tk}(X_t^{(i)}) - \nabla_{\theta_{rj;tk}} A_r(\theta_r^* + \sum_{s \in V \setminus r} \theta_{rs}^* B_s(X_s^{(i)})) B_{tk}(X_t^{(i)})\right]\right. \\ &\quad \left.+ C(X_r^{(i)}) + \theta_r^* B_r(X_r^{(i)}) + \sum_{s \in V \setminus r} B_r(X_r^{(i)}) \theta_{rs}^* B_s(X_s^{(i)}) - A_r\left(\theta_r^* + \sum_{s \in V \setminus r} \theta_{rs}^* B_s(X_s^{(i)})\right)\right\} dX_r \\ &= \exp\left\{A_r\left(\theta_r^* + t' B_{tk}(X_t^{(i)}) + \sum_{s \in V \setminus r} \theta_{rs}^* B_s(X_s^{(i)})\right) - A_r\left(\theta_r^* + \sum_{s \in V \setminus r} \theta_{rs}^* B_s(X_s^{(i)})\right) - \nabla_{\theta_{rj;tk}} A_r\left(\theta_r^* + \sum_{s \in V \setminus r} \theta_{rs}^* B_s(X_s^{(i)})\right) t' B_{tk}(X_t^{(i)})\right\} \\ &= \exp\left\{\frac{\nabla_{\theta_{rj;tk}, \theta_{rj;tk}}^2 A_r(c)}{2} B_{tk}(X_t^{(i)})^2 t'^2\right\} \end{aligned}$$

where  $c = \theta_r^* + \sum_{s \neq r} \theta_{rs}^* B_s(X_s^{(i)}) + v_1 t' B_{tk}(X_t^{(i)})$  for some  $v_1 \in [0, 1]$ . Therefore,

$$\begin{aligned} \frac{1}{n} \sum_{i=1}^n \log E\left[\exp(t' V_{t,jk}^i) | X_{V \setminus r}^{(i)}\right] &= \frac{1}{n} \sum_{i=1}^n \frac{1}{2} \nabla_{\theta_{rj;tk}, \theta_{rj;tk}}^2 A_r(c) B_{tk}(X_t^{(i)})^2 t'^2 \end{aligned}$$

Next lets define event  $\varepsilon_1 = \{\max_{i,t} \|B_t(X_t^{(i)})\|_{\infty} \leq 4 \log p'\}$ . Then, from Proposition 2 we get  $P(\varepsilon_1^c) \leq c_1 n p'^{-4} (\sum_t m_t) \leq c_1 p'^{-3} (\sum_t m_t)$ . If  $t' \leq k_2(n, p)$ , Assumption 5 implies that

$$\frac{1}{n} \sum_{i=1}^n \log E\left[\exp(t' V_{t,jk}^i) | X_{V \setminus r}^{(i)}\right] \leq \frac{k_1(n, p)}{2} \frac{1}{n} \sum_{i=1}^n B_{tk}(X_t^{(i)})^2 t'^2$$

Now, lets define event  $\varepsilon_2 = \{m_{a,x} \frac{1}{n} \sum_{i=1}^n (B_{tj}(X_t^{(i)}))^2 \leq k_4\}$  where  $k_4 \leq \min\{2k_v/3, k_h + k_v\}$ . Then, by proposition (1) we obtain that if  $n \geq \frac{8k_h^2}{k_4^2} \log(\sum_{t \in V} m_t)$ :

$$P(\varepsilon_2^c) \leq \exp\left(-n \frac{k_4^2}{4k_h^2} + \log\left(\sum_{t \in V} m_t\right)\right) \leq \exp(-n c_2) \quad (\text{B.24})$$

Therefore, for  $t' \leq k_2(n, p)$ ,

$$\frac{1}{n} \sum_{i=1}^n \log E\left[\exp(t' V_{t,jk}^i) | X_{V \setminus r}^{(i)}\right] \leq \frac{k_1(n, p) k_4 t'^2}{2} \quad (\text{B.25})$$

Hence, by the standard Chernoff bound technique, for  $t' \leq k_2(n, p)$

$$P\left(\frac{1}{n} \sum_{i=1}^n |V_{t,jk}^i| > \delta \mid \varepsilon_1, \varepsilon_2\right) \leq 2 \exp\left(n \left(\frac{k_1(n, p) k_4 t'^2}{2} - t' \delta\right)\right) \quad (\text{B.26})$$

Setting  $t' = \frac{\delta}{k_1(n, p) k_4}$ , for  $\delta \leq k_1(n, p) k_2(n, p) k_4$ , we arrive to:

$$P\left(\frac{1}{n} \sum_{i=1}^n |V_{t,jk}^i| > \delta \mid \varepsilon_1, \varepsilon_2\right) \leq 2 \exp\left(\frac{-n \delta^2}{2k_1(n, p) k_4}\right) \quad (\text{B.27})$$

Supposing that  $\frac{\alpha \sqrt{\nu_r \min}}{2-\alpha} \frac{\lambda_1 + \lambda_2}{4 \sqrt{m_r m_t}} \leq k_1(n, p) k_2(n, p) k_4$ . It then follows that  $\delta = \frac{\alpha \sqrt{\nu_r \min}}{2-\alpha} \frac{\lambda_1 + \lambda_2}{4 \sqrt{m_r m_t}}$  satisfies

$$P\left(\frac{1}{n} \sum_{i=1}^n |V_{t,jk}^i| > \frac{\alpha \sqrt{\nu_r \min}}{2-\alpha} \frac{\lambda_1 + \lambda_2}{4 \sqrt{m_r m_t}} \mid \varepsilon_1, \varepsilon_2\right) \leq 2 \exp\left(\frac{-\alpha^2}{(2-\alpha)^2} \frac{\nu_r \min n (\lambda_1 + \lambda_2)^2}{32 k_1(n, p) k_4 m_r m_t}\right) \quad (\text{B.28})$$

385  
386  
387  
388  
389  
390  
391  
392  
393  
394  
395  
396  
397  
398  
399  
400  
401  
402  
403  
404  
405  
406  
407  
408  
409  
410  
411  
412  
413  
414  
415  
416  
417  
418  
419  
420  
421  
422  
423  
424  
425  
426  
427  
428  
429  
430  
431  
432  
433  
434  
435  
436  
437  
438  
439

Form which, we obtain the following using union bound

$$\begin{aligned} & P\left(\|W_t^n\|_2 > \frac{\alpha}{2-\alpha} \frac{\sqrt{\nu_r \min}(\lambda_1 + \lambda_2)}{4} \mid \varepsilon_1, \varepsilon_2\right) \leq \\ & P\left(\|W_t^n\|_\infty > \frac{\alpha}{2-\alpha} \frac{\sqrt{\nu_r \min}(\lambda_1 + \lambda_2)}{4 \sqrt{m_r m_t}} \mid \varepsilon_1, \varepsilon_2\right) \\ & \leq 2 \exp\left(\frac{-\alpha^2}{(2-\alpha)^2} \frac{\nu_r \min n (\lambda_1 + \lambda_2)^2}{32 k_1(n, p) k_4 m_r m_t} + \log(\nu_{rt})\right) \end{aligned} \quad (\text{B.29})$$

and hence,

$$\begin{aligned} & P\left(\|W^n\|_{\infty, 2} > \frac{\alpha}{2-\alpha} \frac{\sqrt{\nu_r \min}(\lambda_1 + \lambda_2)}{4} \mid \varepsilon_1, \varepsilon_2\right) \leq \\ & 2 \exp\left(\frac{-\alpha^2}{(2-\alpha)^2} \frac{\nu_r \min n (\lambda_1 + \lambda_2)^2}{32 k_1(n, p) k_4 \nu_r \max} + \log(\nu_r \max) + \log p\right) \end{aligned} \quad (\text{B.30})$$

Finally for  $\lambda_1 + \lambda_2 \geq \frac{8(2-\alpha)}{\alpha} \sqrt{k_1(n, p) k_4 \frac{\nu_r \max \log(p \nu_r \max)}{n \nu_r \min}}$ , we obtain

$$P\left(\|W^n\|_{\infty, 2} > \frac{\alpha}{2-\alpha} \frac{\sqrt{\nu_r \min}(\lambda_1 + \lambda_2)}{4}\right) \leq c_1 p'^{-3} (\sum_t m_t) + \exp(-c_2 n) + \exp(-c_3 n) \quad (\text{B.31})$$

□

**Lemma 3.** Suppose that  $\lambda_1 + \lambda_2 \leq \frac{C_{\min}^2}{40 \log p' D_{\max} d_r k_3(n, p) \nu_r^2 \max}$  and  $\|W_{\setminus r}^n\|_{\infty, 2} \leq \frac{(\lambda_1 + \lambda_2) \alpha \sqrt{\nu_r \min}}{4(2-\alpha)}$ , then,

$$\begin{aligned} & P\left(\|(\theta_{r \cdot}^*)_S - (\hat{\theta}_{r \cdot})_S\|_{\infty, 2} \leq \frac{5\sqrt{\nu_r \max}}{C_{\min}} (\lambda_1 + \lambda_2)\right) \\ & \geq 1 - c p'^{-3} (\sum_t m_t) \end{aligned} \quad (\text{B.32})$$

for some constant  $c > 0$ .

*Proof.* We define  $F(u_S)$  as:

$$\begin{aligned} F(u_S) = & \ell((\theta_{r \cdot}^*)_S + u_S; \mathcal{D}) - \ell((\theta_{r \cdot}^*)_S; \mathcal{D}) \\ & + \lambda_1 \sum_{t \in N(r)} \sqrt{\nu_{rt}} (\|\theta_{rt}^* + u_{rt}\|_2 - \|\theta_{rt}^*\|_2) \\ & + \lambda_2 (\|(\theta_{r \cdot}^*)_S + u_S\|_1 - \|(\theta_{r \cdot}^*)_S\|_1) \end{aligned} \quad (\text{B.33})$$

From the construction of  $\hat{\theta}_{r \cdot}$ , it is clear that  $\hat{u}_S = (\hat{\theta}_{r \cdot})_S - (\theta_{r \cdot}^*)_S$  minimizes  $F$ . And since  $F(0) = 0$ , we have  $F(\hat{u}_S) \leq 0$ . We now show that for some  $B > 0$  with  $\|u_S\|_{\infty, 2} = B$ , we have  $F(u_S) > 0$ . Using this and the fact that  $F$  is convex we can then show that  $\|\hat{u}_S\|_{\infty, 2} \leq B$ .

Let  $u_S$  an arbitrary vector with  $\|u_S\|_{\infty, 2} = \frac{5\sqrt{\nu_r \max}}{C_{\min}} (\lambda_1 + \lambda_2)$ . Then, from the Taylor Series expansion of log likelihood function in  $F$ , we have:

$$\begin{aligned} F(u_S) = & \nabla \ell((\theta_{r \cdot}^*)_S; \mathcal{D})^T u_S \\ & + u_S^T \nabla^2 \ell((\theta_{r \cdot}^*)_S + v u_S) u_S \\ & + \lambda_1 \sum_{t \in N(r)} \sqrt{\nu_{rt}} (\|\theta_{rt}^* + u_{rt}\|_2 - \|\theta_{rt}^*\|_2) \\ & + \lambda_2 (\|(\theta_{r \cdot}^*)_S + u_S\|_1 - \|(\theta_{r \cdot}^*)_S\|_1) \end{aligned} \quad (\text{B.34})$$

for some  $v \in [0, 1]$

We now bound each of the terms in the right hand side of (B.34). From (B.29) and using Cauchy-Schwarz inequality we obtain:

$$\begin{aligned} & \left| \nabla \ell((\theta_{r \cdot}^*)_S; \mathcal{D})^T u_S \right| \\ & \leq \|\nabla \ell((\theta_{r \cdot}^*)_S; \mathcal{D})\|_\infty \|u_S\|_1 \\ & \leq \|\nabla \ell((\theta_{r \cdot}^*)_S; \mathcal{D})\|_\infty d_r \sqrt{\nu_r \max} \|u_S\|_{\infty, 2} \\ & \leq \frac{\alpha}{2-\alpha} \frac{\lambda_1 + \lambda_2}{4} d_r \nu_r \max \frac{5}{C_{\min}} (\lambda_1 + \lambda_2) \\ & = \frac{5 \nu_r \max}{4 C_{\min}} d_r (\lambda_1 + \lambda_2)^2 \end{aligned} \quad (\text{B.35})$$

where the last inequality holds because  $\alpha \in (0, 1]$ . Moreover, from triangle inequality we have:

$$\begin{aligned} & \lambda_1 \sum_{t \in S} \sqrt{\nu_{rt}} (\|\theta_{rt}^* + u_{rt}\|_2 - \|\theta_{rt}^*\|_2) \\ & \geq -\lambda_1 \sum_{t \in N(r)} \sqrt{\nu_{rt}} \|u_{rt}\|_2 \\ & \geq -\lambda_1 d_r \sqrt{\nu_r \max} \|u_S\|_{\infty, 2} \\ & = -\frac{5 d_r \nu_r \max}{C_{\min}} \lambda_1 (\lambda_1 + \lambda_2) \end{aligned} \quad (\text{B.36})$$

Also,

$$\begin{aligned} & \lambda_2 (\|(\theta_{r \cdot}^*)_S + u_S\|_1 - \|(\theta_{r \cdot}^*)_S\|_1) \\ & \geq -\lambda_2 \|u_S\|_1 \\ & \geq -\lambda_2 \|u_S\|_1 \\ & \geq -\lambda_2 d_r \sqrt{\nu_r \max} \|u_S\|_{\infty, 2} \\ & = -\frac{5 \nu_r \max}{C_{\min}} d_r \lambda_2 (\lambda_1 + \lambda_2) \end{aligned} \quad (\text{B.37})$$

On the other hand, by Taylor's approximation of  $\nabla^2 \ell$ , there exists  $\alpha_{jk} \in [0, 1]$  and  $\tilde{u}_{jk}^i$  between  $\theta_{\setminus r}$  and  $\theta_{\setminus r} + v u_S$  such that

$$\begin{aligned} & \Lambda_{\min}(\nabla^2 \ell((\theta_{r \cdot}^*)_S + v u_S)) \\ & \geq \min_{\beta \in [0, 1]} \Lambda_{\min}(\nabla^2 \ell((\theta_{r \cdot}^*)_S + \beta u_S)) \\ & \geq \Lambda_{\min}(Q_{SS}^n) - \\ & \max_{v \in [0, 1]} \max_{\|y\| \leq 1} \left\{ \frac{1}{n} \sum_{i=1}^n \sum_{j, k, l, t, h, s, m, st, mt} \alpha_{jk} v (\nabla^3 A_r(\tilde{u}_{jk}^i))_{jkl} \right. \\ & \left. u_{rt;lh} B_{th}(X_t^i) y_{s,m,j} B_{sm}(X_s^i) B_{s'm'}(X_{s'}^i) y_{s',m',j'} \right\} \end{aligned} \quad (\text{B.38})$$

440  
441  
442  
443  
444  
445  
446  
447  
448  
449  
450  
451  
452  
453  
454  
455  
456  
457  
458  
459  
460  
461  
462  
463  
464  
465  
466  
467  
468  
469  
470  
471  
472  
473  
474  
475  
476  
477  
478  
479  
480  
481  
482  
483  
484  
485  
486  
487  
488  
489  
490  
491  
492  
493  
494

Consider the event  $\varepsilon_1$  as defined in the previous proof. We know that  $P(\varepsilon_1) \geq 1 - c_1 p'^{-3} (\sum_t m_t)$ . Conditioned on  $\varepsilon_1$  and using Assumption 5 we arrive to the following:

$$\begin{aligned} & \Lambda_{\min} (\nabla^2 \ell((\theta_r^*)_S + v u_S)) \\ & \geq C_{\min} - 4 \log p' \|u_S\|_1 D_{\max} \nu_r \max k_3(n, p) \\ & \geq C_{\min} - 4 \log p' d_r \sqrt{\nu_r \max} \|u_S\|_{\infty, 2} D_{\max} \nu_r \max k_3(n, p) \\ & \geq \frac{C_{\min}}{2} \end{aligned} \quad (\text{B.39})$$

where the last inequality holds for  $\lambda_1 + \lambda_2 \leq \frac{C_{\min}^2}{40 \log p' D_{\max} d_r k_3(n, p) \nu_r \max}$ .

Finally using the above bounds we arrive at the following:

$$F(u_S) \geq d_r \nu_r \max \frac{5}{C_{\min}} (\lambda_1 + \lambda_2)^2 \left( -1 - \frac{1}{4} + \frac{5}{2} \right) > 0 \quad (\text{B.40})$$

Therefore

$$\|(\theta_r^*)_S - (\hat{\theta}_r)_S\|_{\infty, 2} \leq \frac{5 \sqrt{\nu_r \max}}{C_{\min}} (\lambda_1 + \lambda_2)$$

□

**Lemma 4.** Suppose that  $\lambda_1 + \lambda_2 \leq \frac{\alpha}{2-\alpha} \frac{\sqrt{\nu_r \min} C_{\min}^2}{400 \nu_r \max \log p' D_{\max} k_3(n, p) d_r}$  and  $\|W_{\nu_r}^n\|_{\infty, 2} \leq \frac{\alpha(\lambda_1 + \lambda_2) \sqrt{\nu_r \min}}{4(2-\alpha)}$ , then,

$$P \left( \frac{\|R^n\|_{\infty, 2}}{\lambda_1 + \lambda_2} \leq \frac{\alpha \sqrt{\nu_r \min}}{4(2-\alpha)} \right) \geq 1 - c p'^{-3} \left( \sum_t m_t \right) \quad (\text{B.41})$$

for some constant  $c > 0$ .

*Proof.* Recall that  $R_j^n = [\nabla^2 \ell(\theta_r^*; \mathcal{D}) - \nabla^2 \ell(\hat{\theta}_r; \mathcal{D})]_j^T (\hat{\theta}_r - \theta_r^*)$  where  $[\cdot]_j^T$  denotes the  $j$ -th row of a matrix. Let us also refer to  $R_{t;jk}^n$  to the coordinate of  $R^n$  corresponding to  $\theta_{r;j,tk}$ . Then,

$$\begin{aligned} R_{t;jk}^n &= \left[ \frac{1}{n} \sum_{i=1}^n B_{tk}(X_t^i) \left[ \nabla^2 A_r \left( \theta_r^* + \sum_{s \neq r} \theta_{rs}^* B_s(X_s^i) \right) - \nabla^2 A_r \left( \hat{\theta}_r^{t,jk} + \sum_{s \neq r} \hat{\theta}_{rs}^{t,jk} B_s(X_s^i) \right) \right]_j \otimes B_r^i \right]^T (\hat{\theta}_r - \theta_r^*) \end{aligned} \quad (\text{B.42})$$

with  $B_r^i$  the vector of sufficient statistics evaluate at the  $i$ -th sample. Introducing the notation  $\langle \theta_r, B_r^i \rangle =: \theta_r + \sum_{s \neq r} \theta_{rs} B_s(X_s^i)$ , from the mean value theorem we obtain

$$\begin{aligned} & \nabla^2 A_{r;jl}(\langle \theta_r^*, B_r^i \rangle) - \nabla^2 A_{r;jl}(\langle \hat{\theta}_r^{t,jk}, B_r^i \rangle) = \\ & -v_{j,l}^i [\langle \hat{\theta}_r - \theta_r^*, B_r^i \rangle] (\nabla^3 A_r)_{jl}(\langle \hat{\theta}_r^{t,jk}, B_r^i \rangle) \end{aligned} \quad (\text{B.43})$$

Therefore, combining (B.42) with (B.43) and using basic properties of krockner product we obtain that

$$\begin{aligned} |R_{t;jk}^n| & \leq \frac{1}{n} \sum_{i=1}^n |B_{tk}(X_t^i)| \nu_r \max k_3(n, p) D_{\max} \|\hat{\theta}_r - \theta_r^*\|_2^2 \\ & \leq 4 \log p' \nu_r \max k_3(n, p) D_{\max} \|\hat{\theta}_r - \theta_r^*\|_2^2 \end{aligned} \quad (\text{B.44})$$

which implies

$$\begin{aligned} \|R_t^n\|_{\infty, 2} & \leq \\ & 4 \sqrt{\nu_r \max} \log p' \nu_r \max k_3(n, p) D_{\max} \|\hat{\theta}_r - \theta_r^*\|_2^2 \leq \\ & 4 \sqrt{\nu_r \max} \log p' \nu_r \max k_3(n, p) D_{\max} \frac{25 d_r \nu_r \max}{C_{\min}^2} \lambda_1^2 \leq \\ & \frac{\lambda_1 + \lambda_2}{4} \frac{\alpha \sqrt{\nu_r \min}}{2-\alpha} \end{aligned} \quad (\text{B.45})$$

with probbity at least  $1 - c p'^{-3} (\sum_t m_t)$ . □

We now prove theorem 2 using lemmas 2-4. Recalling that  $Q^n = \nabla^2 \ell(\theta_r^*; \mathcal{D})$  and the fact that we have set  $(\hat{\theta}_r)_{S^c} = 0$  in our primal-dual construction, we can rewrite condition (B.21) as the following equations:

$$\begin{aligned} & Q_{S^c S}^n [(\hat{\theta}_r)_S - (\theta_r^*)_S] = \\ & W_{S^c}^n - \lambda_1 \sum_{t \notin N(r)} \sqrt{\nu_{rt}} \hat{Z}_{1,rt} - \lambda_2 \hat{Z}_{2,S^c} + R_{S^c}^n \end{aligned} \quad (\text{B.46})$$

$$\begin{aligned} & Q_{SS}^n [(\hat{\theta}_r)_S - (\theta_r^*)_S] = \\ & W_S^n - \lambda_1 \sum_{t \in N(r)} \sqrt{\nu_{rt}} \hat{Z}_{1,rt} - \lambda_2 \hat{Z}_{2,S} + R_S^n \end{aligned} \quad (\text{B.47})$$

Since the matrix  $Q_{SS}^n$  is invertible, the conditions (B.46) and (B.47) can be rewritten as :

$$\begin{aligned} & Q_{S^c S}^n (Q_{SS}^n)^{-1} [W_S^n - \lambda_1 \sum_{t \in N(r)} \sqrt{\nu_{rt}} \hat{Z}_{1,rt} - \lambda_2 \hat{Z}_{2,S} + R_S^n] = \\ & W_{S^c}^n - \lambda_1 \sum_{t \notin N(r)} \sqrt{\nu_{rt}} \hat{Z}_{1,rt} - \lambda_2 \hat{Z}_{2,S^c} + R_{S^c}^n \end{aligned} \quad (\text{B.48})$$

Rearranging yields the following condition:

$$\begin{aligned} & \lambda_1 \sum_{t \notin N(r)} \sqrt{\nu_{rt}} \hat{Z}_{1,rt} = \\ & W_{S^c}^n + R_{S^c}^n - Q_{S^c S}^n (Q_{SS}^n)^{-1} [W_S^n + R_S^n] - \\ & \lambda_2 \hat{Z}_{2,S^c} + Q_{S^c S}^n (Q_{SS}^n)^{-1} [\lambda_1 \sum_{t \in N(r)} \sqrt{\nu_{rt}} \hat{Z}_{1,rt} + \lambda_2 \hat{Z}_{2,S}] \end{aligned} \quad (\text{B.49})$$

*Strict Dual Feasibility:* we now show that for the dual sub-vector  $\hat{Z}_{1,S^c}$ , we have  $\|\hat{Z}_{1,S^c}\|_{\infty, 2} < 1$ . We get the following equation from B.49, by applying triangle inequality:

605  
606  
607  
608  
609  
610  
611  
612  
613  
614  
615  
616  
617  
618  
619  
620  
621  
622  
623  
624  
625  
626  
627  
628  
629  
630  
631  
632  
633  
634  
635  
636  
637  
638  
639  
640  
641  
642  
643  
644  
645  
646  
647  
648  
649  
650  
651  
652  
653  
654  
655  
656  
657  
658  
659

660  
661  
662  
663  
664  
665  
666  
667  
668  
669  
670  
671  
672  
673  
674  
675  
676  
677  
678  
679  
680  
681  
682  
683  
684  
685  
686  
687  
688  
689  
690  
691  
692  
693  
694  
695  
696  
697  
698  
699  
700  
701  
702  
703  
704  
705  
706  
707  
708  
709  
710  
711  
712  
713  
714

$$\begin{aligned} & \lambda_1 \sqrt{\nu_{r \min}} \left\| \hat{Z}_{1,S^c} \right\|_{\infty,2} \leq \\ & \lambda_1 \left\| \sum_{t \notin N(r)} \sqrt{\nu_{rt}} \hat{Z}_{1,rt} \right\|_{\infty,2} \leq \\ & \left[ \|W^n\|_{\infty,2} + \|R^n\|_{\infty,2} \right] \left( 1 + \|Q_{S^c S}^n (Q_{SS}^n)^{-1}\|_{\infty,2} \sqrt{d_r} \right) \\ & + \lambda_2 \sqrt{\nu_{r \max}} \\ & + \|Q_{S^c S}^n (Q_{SS}^n)^{-1}\|_{\infty,2} \left[ (\lambda_1 + \lambda_2) \sqrt{d_r \nu_{r \max}} \right] \end{aligned} \quad (\text{B.50})$$

where  $\nu_{r \min} = \min_t \nu_{rt}$ ,  $\nu_{r \max} = \max_t \nu_{rt}$  and  $d_r = |N(r)|$   
Using mutual incoherence bound 2 on the above equation gives us:

$$\begin{aligned} & \left\| \hat{Z}_{1,S^c} \right\|_{\infty,2} \leq \\ & \frac{1}{\lambda_1 \sqrt{\nu_{r \min}}} \left[ \|W^n\|_{\infty,2} + \|R^n\|_{\infty,2} \right] (2 - \alpha) \\ & + \frac{\lambda_2 \sqrt{\nu_{r \max}}}{\lambda_1 \sqrt{\nu_{r \min}}} \left[ 1 + \|Q_{S^c S}^n (Q_{SS}^n)^{-1}\|_{\infty,2} \sqrt{d_r} \left( \frac{\lambda_1}{\lambda_2} + 1 \right) \right] \end{aligned} \quad (\text{B.51})$$

Using the previous lemmas we obtain the following:

$$\begin{aligned} & \left\| \hat{Z}_{1,S^c} \right\|_{\infty,2} \leq \frac{1}{2\lambda_1} \left[ \alpha (\lambda_1 + \lambda_2) \right] \\ & + \frac{\lambda_2 \sqrt{\nu_{r \max}}}{\lambda_1 \sqrt{\nu_{r \min}}} \left[ 1 + \frac{m_{\min}}{m_{\max}} (1 - \alpha) \left( \frac{\lambda_1}{\lambda_2} + 1 \right) \right] \end{aligned} \quad (\text{B.52})$$

If  $\lambda_2 < \left( \frac{\alpha}{2 - \alpha + 2 \frac{\sqrt{\nu_{r \max}}}{\sqrt{\nu_{r \min}}}} \right) \lambda_1$ , then,

$$\left\| \hat{Z}_{1,S^c} \right\|_{\infty,2} < 1 \quad (\text{B.53})$$

We have shown that the dual is strictly feasible with high probability and also the solution is unique. And hence based on Lemma 1 the method correctly excludes all edges not in the set of edges.

*Correct Neighbourhood Recovery:* To show that all correct neighbours are recovered, it suffices to show that

$$\|(\theta_{r \cdot}^*)_S - (\hat{\theta}_{r \cdot})_S\|_{\infty,2} \leq \frac{\theta_{\min}}{2}$$

where  $\theta_{\min} = \min_{t \in V \setminus r} \|\theta_{rt}\|_2$ .

Using Lemma 3 we can show the above inequality holds if

$$\theta_{\min} \geq \frac{10 \sqrt{\nu_{r \max}}}{C_{\min}} (\lambda_1 + \lambda_2)$$

### C. Full MyFitnessPal Graph

Figure 1 shows a high-level view of the entire VS-MRF learned from the MyFitnessPal food database. The three macro-nutrients (fat, carbs, and protein) correspond to the three largest hubs with the remaining nine micro-nutrients representing smaller hubs.

### References

Yang, Eunho, Baker, Yulia, Ravikumar, Pradeep, Allen, Genevera, and Liu, Zhandong. Mixed graphical models via exponential families. *Proceedings of the Seventeenth International Conference on Artificial Intelligence and Statistics*, pp. 1042–1050, 2014.

715  
716  
717  
718  
719  
720  
721  
722  
723  
724  
725  
726  
727  
728  
729  
730  
731  
732  
733  
734  
735  
736  
737  
738  
739  
740  
741  
742  
743  
744  
745  
746  
747  
748  
749  
750  
751  
752  
753  
754  
755  
756  
757  
758  
759  
760  
761  
762  
763  
764  
765  
766  
767  
768  
769

770  
771  
772  
773  
774  
775  
776  
777  
778  
779  
780  
781  
782  
783  
784  
785  
786  
787  
788  
789  
790  
791  
792  
793  
794  
795  
796  
797  
798  
799  
800  
801  
802  
803  
804  
805  
806  
807  
808  
809  
810  
811  
812  
813  
814  
815  
816  
817  
818  
819  
820  
821  
822  
823  
824

825  
826  
827  
828  
829  
830  
831  
832  
833  
834  
835  
836  
837  
838  
839  
840  
841  
842  
843  
844  
845  
846  
847  
848  
849  
850  
851  
852  
853  
854  
855  
856  
857  
858  
859  
860  
861  
862  
863  
864  
865  
866  
867  
868  
869  
870  
871  
872  
873  
874  
875  
876  
877  
878  
879

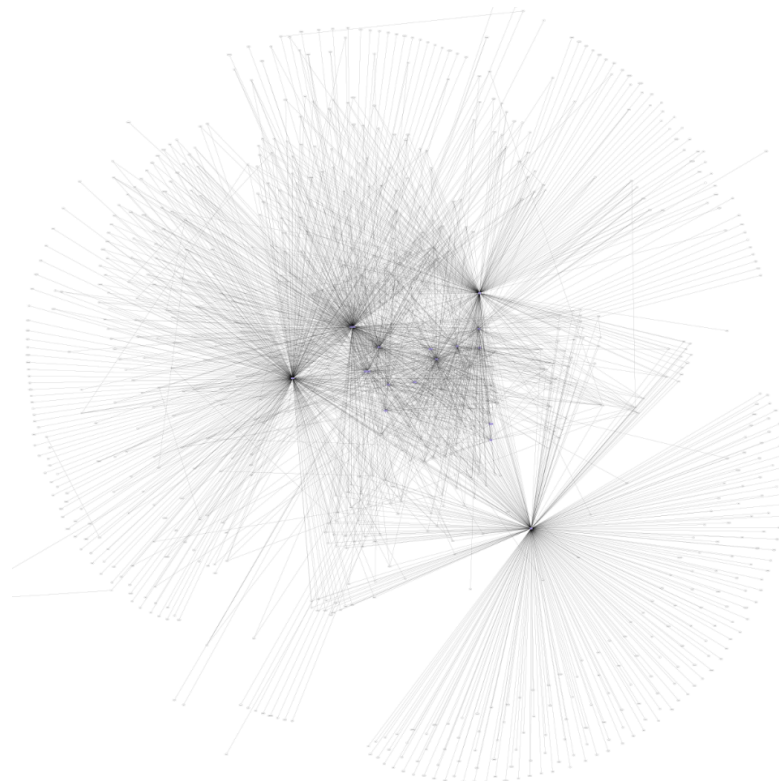

Figure 1. Full MRF learned from the MyFitnessPal food database. The hubs correspond to point-inflated gamma nutrient nodes, with the three largest hubs being the macro-nutrients (fat, carbs, and protein).
